# 1 Probing the Link Between Vision and Language in 2 Material Perception

3 Chenxi Liao<sup>1\*</sup>, Masataka Sawayama<sup>3</sup>, and Bei Xiao<sup>2</sup>

4 <sup>1</sup>American University, Department of Neuroscience, Washington DC, 20016, USA

5 <sup>2</sup>American University, Department of Computer Science, Washington, DC, 20016, USA

6 <sup>3</sup>The University of Tokyo, Graduate School of Information Science and Technology, Tokyo, 113-0033, Japan

7 \*cl6070a@american.edu

## 8 Abstract

9 Materials are the building blocks of our surroundings. Material perception enables us to create a vivid mental representation of  
10 our environment, fostering the appreciation of the qualities and aesthetics of things around us and shaping our decisions on how  
11 to interact with them. We can visually discriminate and recognize materials and infer their properties, and previous studies  
12 have identified diagnostic image features related to perceived material qualities. Meanwhile, language reveals our subjective  
13 understanding of visual input and allows us to communicate relevant information about the material. To what extent do words  
14 encapsulate the visual material perception remains elusive. Here, we used deep generative networks to create an expandable  
15 image space to systematically create and sample stimuli of familiar and unfamiliar materials. We compared the representations  
16 of materials from two cognitive tasks: visual material similarity judgments and verbal descriptions. We observed a moderate  
17 correlation between vision and language within individuals, but language alone cannot fully capture the nuances of material  
18 appearance. We further examined the latent code of the generative model and found that image-based representation only  
19 exhibited a weak correlation with human visual judgments. Joining image- and semantic-level representations substantially  
20 improved the prediction of human perception. Our results imply that material perception involves the semantic understanding  
21 of scenes to resolve the ambiguity of the visual information and beyond merely relying on image features. This work illustrates  
22 the need to consider the vision-language relationship in building a comprehensive model for material perception.

## 23 Introduction

24 We often describe what we see with words. Language reveals how we interpret and communicate our sensory experiences  
25 and provides critical information about our mental representation of the environment<sup>1</sup>. The interaction between language  
26 and perception has long been debated, mainly in visual cognition, such as color categorization<sup>2-4</sup> and scene interpretation<sup>5,6</sup>.  
27 Jointly modeling visual and natural language features expands the capability of artificial intelligence systems (e.g., image-  
28 classification<sup>7,8</sup>, image-retrieval<sup>9,10</sup>, and text-to-image generation<sup>11,12</sup>) and provides valuable tools for investigating the neural  
29 correlates of object and scene recognition<sup>13,14</sup>. Little is known about how and what aspects we communicate about materials,

30 which are the building blocks of objects and the environment. Material perception facilitates us to form a vivid and rich  
31 representation of the external world, which in turn guides our interaction with it. Although we can visually recognize and  
32 discriminate a broad range of materials, we might find it challenging to precisely and effectively describe their appearances  
33 and properties with words. To what extent do words encapsulate the richness of visual material perception? What are the  
34 communicable dimensions of materials?

35 Based on visual input, we can often distinguish materials, and infer their diverse optical properties (e.g., surface glossi-  
36 ness<sup>15–18</sup>, translucency<sup>19–27</sup> or transparency<sup>28</sup>), surface properties (e.g., roughness<sup>29</sup>), mechanical properties (e.g., softness<sup>30</sup>,  
37 stiffness<sup>31</sup>) and states (e.g., freshness<sup>32</sup>, wetness<sup>33</sup>). Previous works actively examined how visual estimates of material at-  
38 tributes are related to the statistical image features<sup>34</sup>, as well as seeking to probe the neural representation of material perception  
39 in cortical areas of the ventral visual pathway<sup>35–38</sup>. Along with visual discrimination, verbalizing what we see reflects, to a  
40 certain degree, how we process and organize visual information into semantic-level representation. Verbal description could  
41 serve as an interpretable representation that encodes the salient features of material qualities. While a plethora of works  
42 scrutinized the visual estimation of specific material properties related to physics<sup>16,34,39,40</sup>, few studies shined the light on  
43 more subjective material perception from both visual judgment and language expression. With a large-scale image dataset of  
44 materials, Schmidt et al. (2023)<sup>41</sup> used visual triplet similarity judgments from crowd-sourcing to distill a representational  
45 space, which was later annotated by humans to find conceptual and perceptual dimensions of materials. Cavdan et al. (2023)<sup>42</sup>  
46 studied the structure of the representational space of perceptual softness triggered by material name with a cross-group analysis  
47 and suggested that verbally activated softness representation correlates with that derived from vision<sup>30</sup>. However, participants  
48 in these studies were often limited to judging materials based on predetermined categories and attributes without being given  
49 the opportunity to express their personal semantic interpretations. Further, previous works typically focused on the group-level  
50 analysis and downplayed the potential individual variances.

51 To definitively assess the link between vision and language in material perception, it is crucial to measure visual judgment  
52 and verbal description within the individual participants, as well as allow them to freely articulate their unique visual experiences.  
53 Such verbal reports also serve as an accessible information channel for individuals' understanding of materials. For example,  
54 when looking at the photograph of a chunk of tofu (Asian food) under a particular lighting, different participants might describe  
55 it differently (Figure 1): individuals identifying the object as tofu may describe it as soft, whereas those recognizing it as  
56 plastic may describe it as hard. How do we systematically design stimuli that couple with object-level realism and also elicit  
57 semantic-level ambiguity?

58 Here, we developed an effective approach to create an extensive range of plausible visual appearances of familiar and  
59 novel materials (see Figure 2). We use an unsupervised image synthesis model, StyleGAN2-ADA<sup>43</sup>, to generate images of  
60 diverse materials based on the learning of real-world photos. As a result, the model parameterizes the statistical structures of  
61 material appearances<sup>27</sup> and facilitates linear interpolation between image data points, allowing us to morph between different  
62 material categories (e.g., morphing between a soap to a rock results in an ambiguous translucent object shown in Figure 2C).

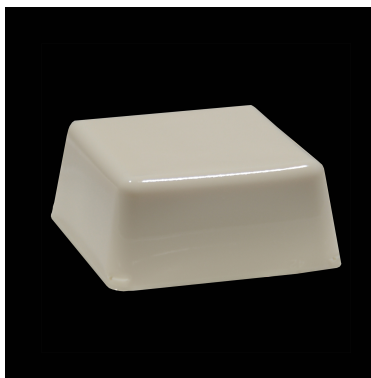

**Fig. 1.** Given a photograph of an object, different participants might perceive its material properties differently. Those who recognize it as tofu might expect it to be soft, while those who see it as plastic might perceive it as hard. Image features alone might not predict individual perception.

63 This approach enables us to continuously vary the multidimensional structural features of materials (e.g., the combination of  
64 shape and color variation) and build an expanded Space of Morphable Material Appearance. The morphed materials resemble  
65 the visual characteristics of both original materials (e.g., soap and rock), potentially resulting in the ambiguity of perceived  
66 material identity. This offers an opportunity to investigate the influence of semantic-level interpretation on material perception.  
67 Furthermore, our models' learned multi-scale latent space allows us to construct image-feature-based representations and  
68 compare them to human visual judgments.

69 We measured material perception with two behavior tasks involving vision and language within individuals: Multiple  
70 Arrangement and Verbal Description (Figure 3). Stimuli were systematically sampled from the Space of Morphable Material  
71 Appearance (Figure 2D and E). In the Multiple Arrangement task, participants arranged materials based on visual similarities<sup>44</sup>.  
72 For the verbal description task, the participants described the same images with texts. With the recent advancements in Large  
73 Language Models (LLMs), it is now possible to create a representation based on verbal reports provided by the participants.  
74 We discovered a moderate vision-language correlation within individual participants by quantitatively comparing the behavioral  
75 representations derived from two tasks. We observed that material naming, colorfulness, and softness could be critical in  
76 explaining the participants' visual similarity judgments. We also analyzed how the representations based on image features  
77 expressed through the model's latent code relate to human visual judgments. Our findings imply that material perception  
78 extends beyond the analysis of image features in a feed-forward manner, encompassing also the semantic interpretation of  
79 visual scenes, likely shaped by the individual's prior experience and knowledge.

## 80 Results

### 81 *Space of Morphable Material Appearance*

82 Employing the unsupervised learning model, StyleGAN2-ADA, we generated images of diverse materials with perpetually  
83 convincing quality by training on real-world photos (Figure 2). With its multi-scale generative network ( $G$ ) and scale-dependent  
84 latent space ( $W$ ), the model learns the statistical regularity of the images at multiple spatial scales, spontaneously disentangling

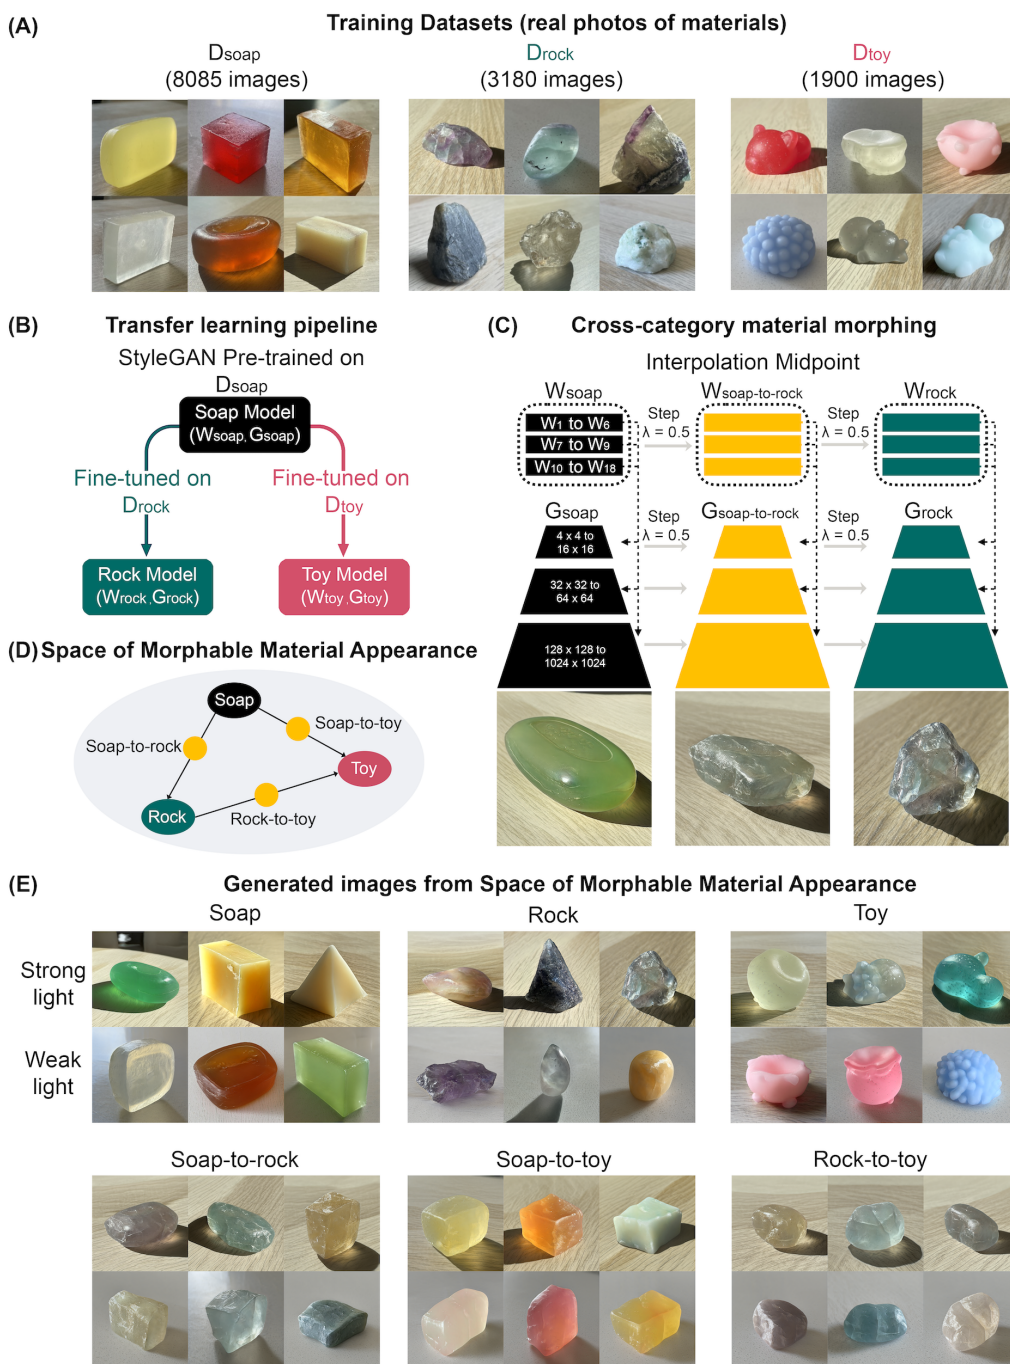

**Fig. 2.** Overview of the synthesis pipeline for morphable material appearances. (A) Training datasets. (B) Transfer learning pipeline. Upon training, we obtained models to generate images from three material classes. We can generate images of a desired material (e.g., soaps) by injecting the latent codes (e.g.,  $w_{\text{soap}} \in W_{\text{soap}}$ ) into the corresponding material generator (e.g.,  $G_{\text{soap}}$ ). (C) Illustration of cross-category material morphing. By linearly interpolating between a soap and a rock, we obtain a morphed material, “soap-to-rock,” produced from its latent code  $w_{\text{soap-to-rock}}$  and generator  $G_{\text{soap-to-rock}}$ . (D) Illustration of the Space of Morphable Material Appearance. (E) Examples of generated images from the Space of Morphable Material Appearance. These images are a subset of stimuli used in our psychophysical experiments, covering two major lighting conditions (i.e., strong and weak lighting).



85 semantically meaningful visual attributes, such as the object's shape, texture, and body color<sup>27</sup>. Here, we built our own image  
86 datasets that include three materials: soaps ( $D_{soap}$ ), rocks ( $D_{rock}$ ), and squishy toys ( $D_{toy}$ ) (Figure 2A). We fine-tuned the  
87 StyleGAN pre-trained on the large soap dataset  $D_{soap}$  on the smaller datasets  $D_{rock}$  and  $D_{toy}$  (Figure 2B). With a short training  
88 time, the Soap Model ( $W_{soap}$ ,  $G_{soap}$ ) turned into Rock ( $W_{rock}$ ,  $G_{rock}$ ) and Toy Models ( $W_{toy}$ ,  $G_{toy}$ ) and can synthesize images  
89 of realistic and diverse rocks/crystals and squishy toys, under the broad variation of three-dimensional (3D) shapes, colors,  
90 textures, and lighting environments (Figure 2E Top Row). The effectiveness of transfer learning also suggests that the different  
91 categories of materials have common visual characteristics, such as color variation, specular highlight, and surface geometry;  
92 thus, learning features from one material benefits learning new materials.

93 We can produce novel material appearances without additional training, by morphing between existing learned materials.  
94 Given the images of a pair of source and target materials, we can linearly interpolate between their layer-wise latent codes (e.g.,  
95  $w_{soap}$  and  $w_{rock}$ ) while interpolating all convolution layers' weight parameters of the corresponding material generators (e.g.,  
96  $G_{soap}$  and  $G_{rock}$ ) (see Method). At a given step size, we can synthesize the image of a morphed material with the interpolated  
97 latent code (e.g.,  $w_{soap-to-rock}$ ) and generator (e.g.,  $G_{soap-to-rock}$ ). Figure 2C illustrates the method of creating a morphed  
98 material between soap and rock.

99 Combining transfer learning and model morphing, we constructed an expandable Space of Morphable Material Appearance,  
100 from which we can systematically sample and create existing and novel material appearances with object-level realism (Figure  
101 2D). In this study, we focused on the material appearances at the morphing midpoints (i.e., step  $\lambda = 0.5$ ). With this technique,  
102 we generated morphed materials, soap-to-rock (midpoint from soap to rock), soap-to-toy (midpoint from soap to squishy toy),  
103 and rock-to-toy (midpoint from rock to squishy toy) (Figure 2E Bottom row). We sampled 72 images from the Space of  
104 Morphable Material Appearance as stimuli for both of our behavioral experiments (see Method).

### 105 ***Visual Material Judgment and Verbal Description are Moderately Correlated within Individuals***

106 Using the above-mentioned stimuli, we measured material perception with Multiple Arrangement and Verbal Description  
107 tasks. In the Multiple Arrangement task, participants were instructed to place the images within the circled region based on  
108 the "similarity of material properties" (Figure 3A). The task prompted the consideration of various aspects of the materials,  
109 allowing for the capturing of a multidimensional representation of how visual material discrimination is processed. During the  
110 Verbal Description task, the same group of participants provided unrestricted descriptions of the material with texts covering  
111 five aspects: material name, color, optical properties, mechanical properties, and surface texture. These aspects have been found  
112 useful in characterizing the mental representations of materials<sup>41</sup>.

113 We constructed the Representational Dissimilarity Matrices (RDM) from each participant's behavioral results for both tasks.  
114 A Vision RDM is created based on the on-screen Euclidean distances of pairwise comparisons of material similarity<sup>44</sup> from  
115 the Multiple Arrangement. Meanwhile, we also built a Text RDM by encoding the images' text descriptions provided by the  
116 participant into an embedding space with a large pre-trained LLM (see Methods). We tested four publicly accessible LLMs,  
117 CLIP<sup>7</sup>, BERT<sup>45</sup>, Sentence-BERT<sup>46</sup>, and GPT-2<sup>47</sup>, whose embedding spaces were shown to capture the semantic similarity of

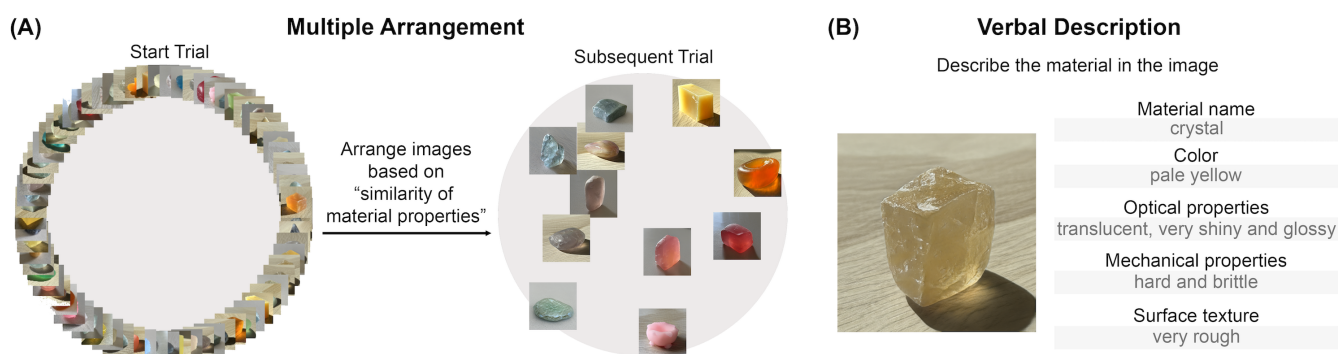

**Fig. 3.** Illustrations of psychophysical experiment interface. (A) The Multiple Arrangement task. Participants ( $N = 16$ ) arranged images within a circle based on their judgment of the visual similarity of material properties. In the first trial, participants were presented with all 72 images of materials. In each subsequent trial, a subset of images was iteratively presented based on an adaptive sampling algorithm<sup>44</sup>. (B) The Verbal Description task. With free-form text input, participants were asked to describe the material shown in the image from five aspects: material name, color, optical properties, mechanical properties, and surface texture. The gray font texts are example responses.

118 textual information. The primary analysis in this paper is conducted using the CLIP embedding unless otherwise noted.

119 Across individuals, we found a moderate correlation between the RDMs of the two tasks within each participant. Figure  
120 4A displays the RDMs of three participants. The comprehensive statistical results encompassing all participants are provided  
121 in Figure 6. While the participants used different numbers of unique words ( Figure 6A, mean = 128 unique words, max =  
122 288 words, min = 37 words), we found that all of the participants' verbal responses exhibited a significant correlation (all  
123  $p < 0.001$ , FDR-corrected) with their own multiple arrangement behavior, signifying the presence of inherent cross-task  
124 consistency within an individual (Figure 6B blue bars). These moderate correlations reflect that participants' own Vision and  
125 Text RDMs share similarities in their overall structures, while also underpinning differences in their local patterns. We observed  
126 a stronger correlation when comparing the group average Vision and Text RDMs (Spearman's correlation  $r_s = 0.75$ ,  $p < 0.001$ )  
127 (rightmost column in Figure 4A). By applying classical multidimensional scaling (MDS) on the group average RDMs, we  
128 found that Vision and Text embeddings exhibit similar organizations, forming three major clusters: squishy-like (squishy toys,  
129 top left cluster in MDS), soap-like (soap and soap-to-toy, bottom left cluster in MDS), and rock-like (rock, rock-to-toy, and  
130 soap-to-rock, bottom right cluster in MDS).

131 Despite overall similarities in general patterns among participants' behavioral results, the Vision RDMs across participants  
132 reveal substantial individual differences in finer material discrimination (Figure 4A). We assessed the inter-participant consistency  
133 of the behavioral tasks with the leave-one-out test by iteratively correlating one participant's data with the group average  
134 of the rest of the participants. We found that Vision RDMs (mean Spearman's correlation  $r_s = 0.41$ ) show higher variance  
135 than the Text RDMs (mean Spearman's correlation  $r_s = 0.57$ ). Compared with the ways of articulating materials with words,  
136 participants tended to be more diverse in how they visually judge material similarities. The varied degree of correlation between  
137 vision- and language-based representations across participants underscores the complex nature of individual differences in  
138 material reasoning.

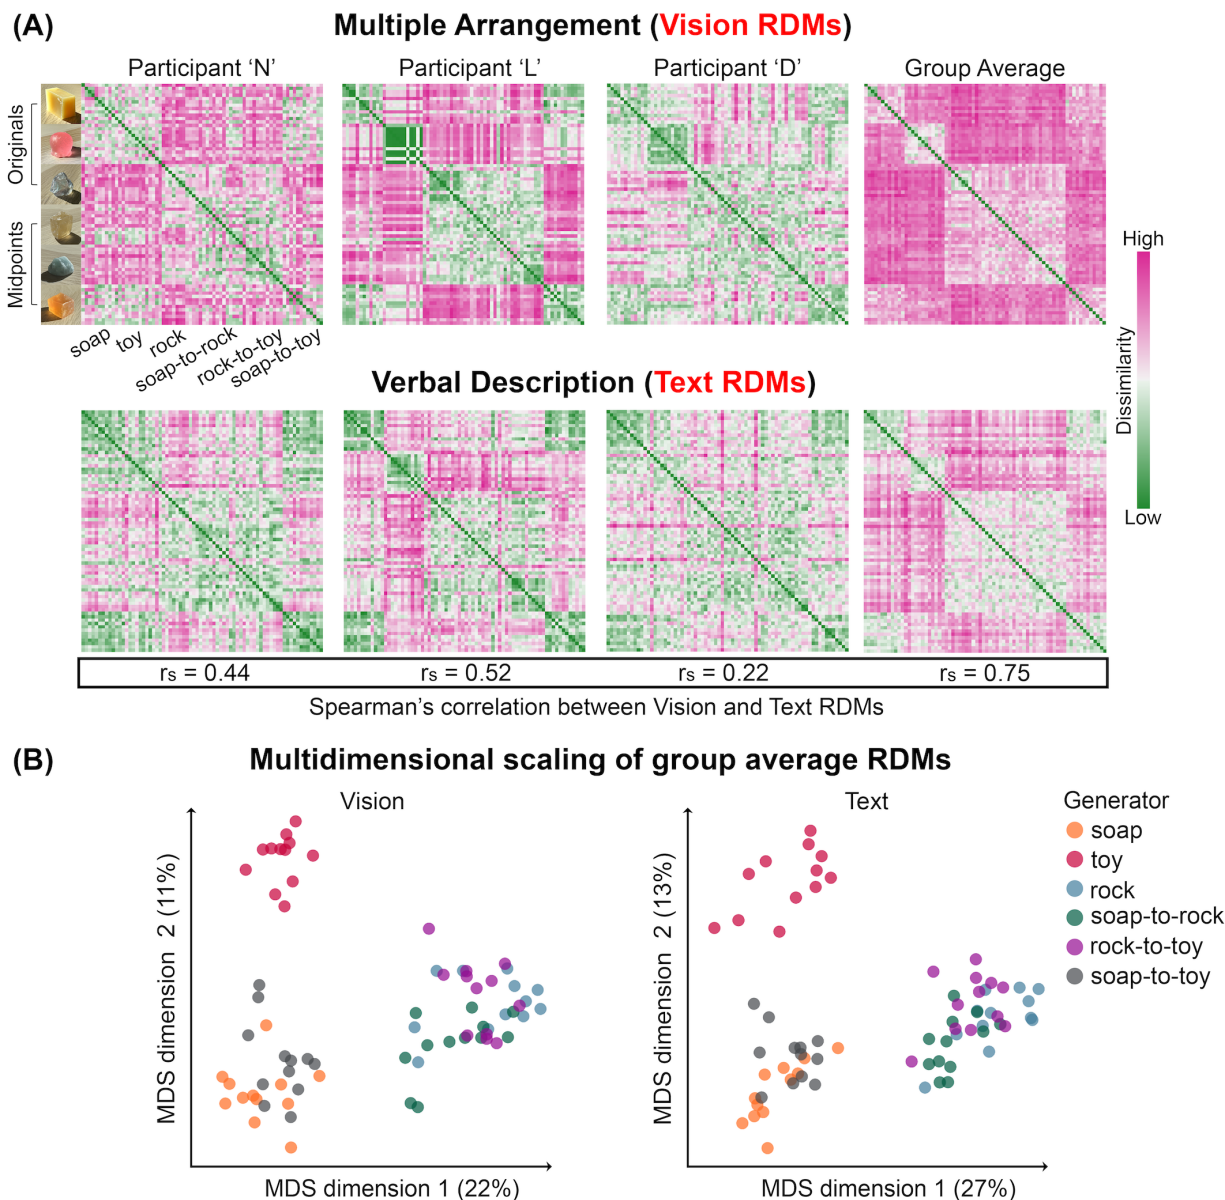

**Fig. 4.** Vision-based similarity judgment and verbal description of materials are moderately correlated. (A) Representational Dissimilarity Matrices (RDMs) of vision-based material similarity judgment via Multiple Arrangement (Vision RDMs) and Verbal Description (Text RDMs). Top: Vision RDMs. Bottom: Text RDMs. From left to right: RDMs for three participants and the group average RDM across all participants. In each RDM, on both x- and y-axis, the images are organized by the type of material generator, spanning from the learned original materials (i.e., soap, toy, rock) to the morphed midpoint materials (i.e., soap-to-rock, rock-to-toy, and soap-to-toy). The green colors indicate low dissimilarity between pairwise combinations of materials, whereas the pink colors indicate high dissimilarity. The Spearman's correlation ( $r_s$ ) between the corresponding Vision and Text RDMs are annotated in the box below. (B) Two-dimensional embedding from the MDS of the group average Vision and Text RDMs, color-coded based on the six types of material generator depicted in (A).

139 **Vision- and Language-based Representations Reveal Salient Perceptual Features**

140 Next, we sought to interpret the representative dimensions of materials expressed through the behavioral tasks. We annotated  
141 the MDS results of the Vision RDMs with the image stimuli and the participants' verbal descriptions. Colorfulness, material

142 name, and softness are the key features across participants. On the group average level, as shown in Figure 5A, we labeled the  
143 most frequent word that participants used in the description of “material name” and “mechanical properties” for each stimulus.  
144 Materials with vivid body colors and high saturation (left side in MDS, e.g., red, pink) are separated from less saturated colors  
145 (e.g., light blue and light gray) (leftmost column in Figure 5A). Materials’ chemical and physical properties determine the  
146 specific range of their colors and surface textures<sup>32</sup>. This innate connection may facilitate visual material categorization. We  
147 also observed that participants tend to group “hard” materials (e.g., rock, glass, or crystal) away from “soft” ones (e.g., soap,  
148 wax, or rubber) (middle column in Figure 5). Here, perceived softness might be a notable attribute associated with the material  
149 category. At the individual level, although participants used different sets of material names to depict the stimuli, they grouped  
150 the materials with similar names close to each other. This suggests that visual judgments are influenced by the interpretation of  
151 material identity (rightmost column in Figure 5B).

152 We found that removing the “material names” from the text embeddings (“No material name” condition in Figure 6B)  
153 significantly decreased the correlation between Vision and Text RDMs for almost all participants (Wilcoxon one-sided signed-  
154 rank test, all  $p < 0.0005$  across three language models). Different LLMs produced similar results, except GPT-2 embedding led  
155 to lower vision-language correlations. Material naming may serve as a high-level feature that envelops the particular structural  
156 combination of various material characteristics, providing critical information to the perceptual inference of material attributes.  
157 Together, our results suggest that participants actively use semantic-level features to distinguish and group materials in visual  
158 assessment, which might explain the correlation between the two behavioral tasks.

### 159 ***Image-level Representations from the Generative Model Weakly Correlate with Human Perception***

160 We investigated how image-level features extracted from our image-generative model contribute to participants’ visual judgment  
161 of materials. To generate an image with StyleGAN, a latent code  $w \in W$  is transformed to the channel-wise latent features,  
162 StyleSpace features<sup>48</sup>, with different learned affine transformations at each convolution layer (i.e., b4.conv1 to b1024.conv1)  
163 of the generator  $G$ . Figure 7A illustrates the structure of the StyleSpace features. For a given image, we can retrieve 17  
164 StyleSpace-feature vectors representing image features across nine resolutions (from 4 pixels  $\times$  4 pixels to 1024 pixels  $\times$  1024  
165 pixels) in its image generation process. StyleSpace features represent visual attributes in a scale-specific manner (Figure 7B).  
166 Manipulating coarse-scale features (4  $\times$  4 to 16  $\times$  16 resolutions) mainly changes the rough contour of the source material to  
167 that of the target material. Middle-scale features (32  $\times$  32 to 64  $\times$  64 resolutions) correspond to the material surface properties  
168 (e.g., translucency) and local variation of geometric complexity. Fine-scale features (128  $\times$  128 to 1024  $\times$  1024 resolutions)  
169 represent the more refined details, such as the microstructure of surface texture and the object’s body color. Based on these  
170 latent features, we built 17 StyleSpace-feature RDMs to represent the image-level dissimilarity of materials.

171 We computed the Spearman’s correlation between a participant’s Vision RDM and each of the StyleSpace-feature RDMs.  
172 The individual participants’ data with statistical significance ( $p < 0.005$  with FDR correction) are shown in Figure 7D. Our  
173 analysis indicated weak but significant correlations (mean correlations range from 0.09 to 0.24) between participants’ visual  
174 perception of material similarity and image features across all StyleSpace layers. The coarse-to-middle-scale StyleSpace



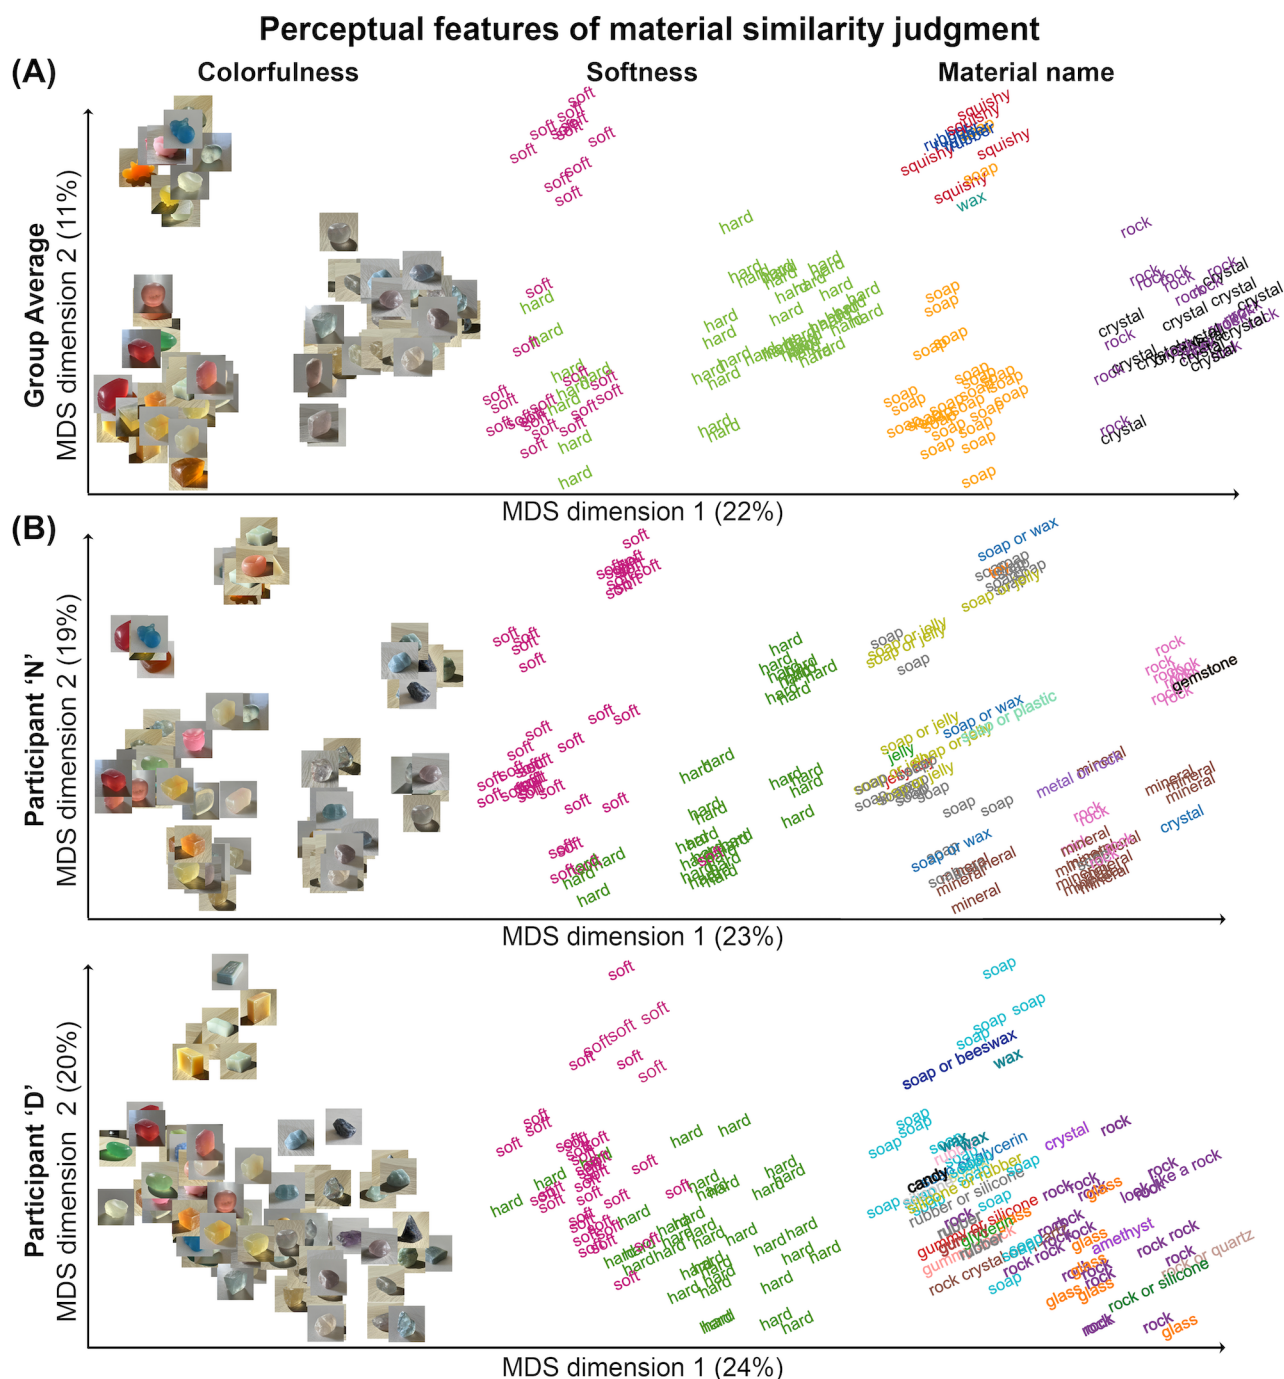

**Fig. 5.** Colorfulness, softness, and material name are critical perceptual features in material similarity judgment. (A) Annotated MDS of the group average Vision RDM. For “colorfulness”, we marked the image stimuli. For “softness” and “material name”, we marked the most frequently used word aggregated across all participants. (B) MDS of two individual participants’ Vision RDMs, annotated with their own use of words.

175 features generally show low correlations with the participants’ Vision RDMs, implying that the object’s rough contour and  
 176 middle-scale surface texture alone are insufficient for material discrimination. In contrast, the fine-scale StyleSpace features  
 177 show relatively higher correlations with the multiple arrangement data of some participants. Nevertheless, these representations  
 178 (e.g., b256.conv1 RDM in Figure 7C) still exhibit substantially different patterns from human perceptual results. Our findings



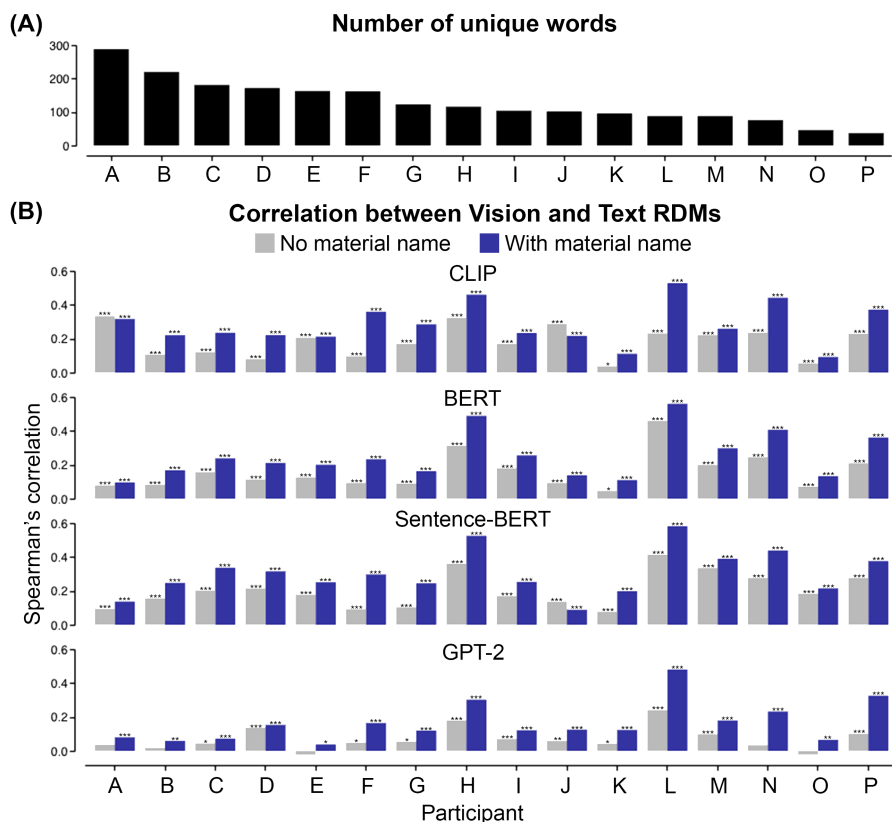

**Fig. 6.** (A) Distribution of the number of unique words participants used in the Verbal Description task. (B) Comparison of vision-language correlations across different language models. For each individual, we computed within-person Spearman's correlation between the Vision and Text RDMs. The Text RDM is built by embedding verbal descriptions with four different pre-trained LLMs: CLIP, BERT, Sentence-BERT, and GPT-2. The blue bars indicate the correlation values when all text features are included to construct the Text RDM. The gray bars indicate the correlation values when the "material name" is excluded from constructing the Text RDM. Asterisks indicate FDR-corrected p-values: \*\*\*  $p < 0.001$ , \*\*  $p < 0.01$ , and \*  $p < 0.05$ .

179 demonstrate that participants do not solely rely on image features when evaluating material similarity. Instead, they incorporate  
 180 high-level cognition to ensure that their interpretations of the images are consistent.

### 181 **Joining Text and Image-level Representations Improves Prediction of Human Visual Judgments**

182 Lastly, we tested whether combining the image representations and human verbal descriptions improves the prediction of human  
 183 visual judgments of materials. For each individual, we used the 17 different StyleSpace-feature RDMs and the participant's  
 184 Text RDM together (i.e., full model) or only the Text RDM (i.e., reduced model) as predictors in a multiple regression model to  
 185 predict the participant's Vision RDM. Compared with the reduced model, the model incorporating StyleSpace features and  
 186 verbal descriptions performs significantly better ( $p < 0.0001$  with ANOVA test) and increases the explained variance (adjusted  
 187  $R^2$ ) across all participants (Figure 7E). This provides compelling evidence that visual judgment of materials involves integrating  
 188 and leveraging multiple spatial scales' image features and that participants' verbal reports provide complementary information  
 189 to the prediction of their visual perception.

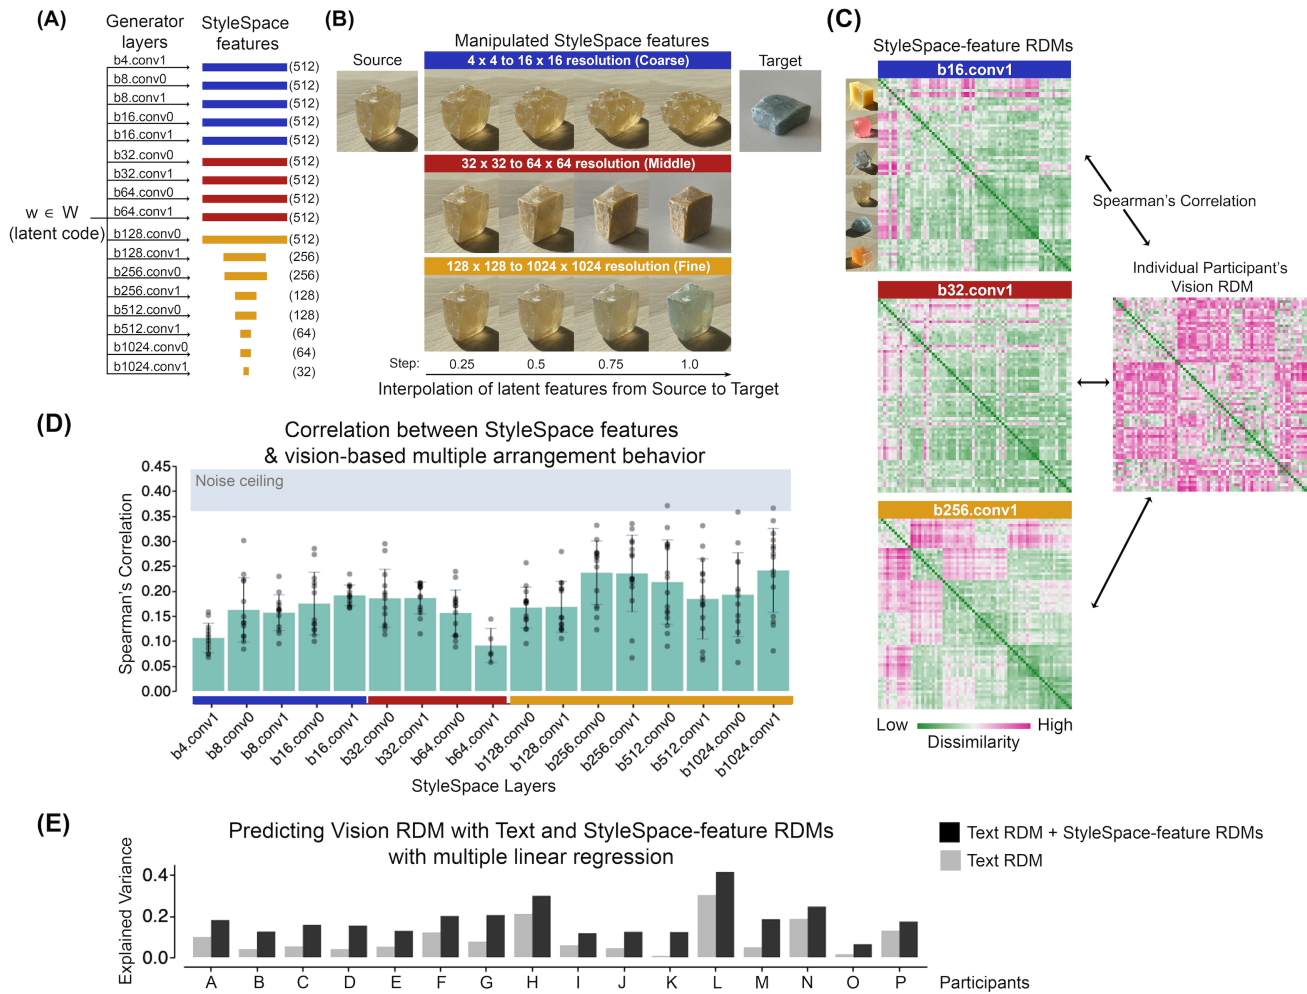

**Fig. 7.** Comparing representations from the image features and human visual similarity judgment of materials. (A) Structure of the StyleGAN's StyleSpace features. The blue, red, and yellow bars illustrate the StyleSpace-feature vectors at coarse-, middle-, and fine-spatial scales, respectively. The number in the parentheses denotes the dimensionality of the StyleSpace-feature vector at a specific layer. (B) Manipulating StyleSpace features at different spatial scales leads to changes in various visual attributes. From left to right of each row, a subset of StyleSpace features of the source image is interpolated with those of the target image, while keeping the rest of the source image's StyleSpace features unchanged. In this example, both the source and target images are produced from the soap-to-rock generator. (C) Examples of StyleSpace-feature RDMs constructed from the StyleSpace features at different spatial scales. We compute the correlation between each participant's Vision RDM and StyleSpace-feature RDM corresponding to each layer. (D) The Spearman's correlation between an individual's Vision RDM and StyleSpace-feature RDM from each of the 17 layers (black dots). Among the 272 pair comparisons (16 participants  $\times$  17 layers), 83% of them demonstrate statistical significance and are plotted. The green bars represent the average correlations across participants. The blue-shaded region indicates the upper and lower bounds of the noise ceiling. (E) Jointing verbal description with StyleSpace features improves the prediction of multiple arrangement behavior for all participants with multiple linear regression. The x-axis represents individual participants. The y-axis represents the explained variance.

## 190 Discussion

191 We probed how vision and language are connected in material perception. Using an unsupervised image synthesis model, we  
 192 developed a novel approach to create a diverse array of plausible visual appearances of familiar and novel materials. With these  
 193 images, we measured and analyzed behavioral tasks alongside image features derived from our material appearance synthesis

194 network. We found a moderate but significant correlation between visual judgments and verbal descriptions of materials  
195 within individual participants, signifying both the efficacy and limitation of language in describing materials. Along with the  
196 image-level analysis of material similarity, our findings suggest that material perception goes beyond extracting information  
197 solely from low-to-mid-level image statistics; instead, it may actively integrate semantic-level representation to resolve the  
198 ambiguous visual information. Demonstrating the potential link between vision- and language-based representations, our study  
199 invites further investigation of material perception by considering it an avenue to explore the language-perception relationship  
200 across a broad range of visual cognition tasks.

201 The lack of precise alignment between the representations from two behavioral tasks pinpoints the gap between visual  
202 judgment and verbal description of materials (Figure 7E). On the one hand, combining vision- and text-based representations  
203 reveals informative features for material discrimination, such as the object's color, softness, and material name. This would  
204 be challenging to manifest when limited to a single modality. At the same time, the verbal descriptions do not fully capture  
205 the nuances of material appearances the participants visually perceive. One potential explanation could be that participants  
206 faced difficulty in describing subtle visual characteristics, such as spatial color variation and surface geometric complexity, with  
207 accuracy and consistency. Nevertheless, these visual attributes could be crucial in finely distinguishing samples within the  
208 general clustering of materials. Our findings reveal that combining latent image features and text representations enhances  
209 the explained variance in participants' visual assessment of materials. This implies that semantic representation and visual  
210 perception collaboratively facilitate material judgment. Our finding is consistent with the recent research demonstrating that  
211 assembling distilled image features from Deep Neural Networks (DNN) and textual features from LLMs reduces the gap to  
212 approximate human similarity judgment<sup>49,50</sup>. The misalignment between language and vision in material perception draws  
213 attention to the potential limited expressiveness of language in communicating about materials. This notion is crucial to consider  
214 in developing computer vision applications, spanning from material-related scene annotation to text-guided material synthesis.

215 Our results show that when the material name is removed from the text embedding, the correlation between Vision and Text  
216 RDMs systematically decreases across participants (Figure 6). This may stem from the functional roles that nouns (material  
217 names) play in everyday language usage<sup>51</sup>. With material names (e.g., crystal or soap), we can label materials that possess  
218 an array of unique and/or related attributes, such as softness, translucency, glossiness, and the object's shape. During this  
219 labeling process, material names can encapsulate the perceptual similarity of materials across multiple dimensions and partition  
220 samples of materials into a system of semantic categories<sup>52</sup>, potentially helping us communicate about materials in an efficient  
221 way. In future works, we might investigate material perception from the perspective of effective communication<sup>4,52,53</sup>, such as  
222 examining the structure and complexity of material naming and comparing material naming across various language systems.

223 The computational mechanisms of material perception remain an area of ongoing exploration without a unified consensus.  
224 Over the past decade, a prevailing view has portrayed material perception as a mid-level visual process anchored in the  
225 feed-forward-based visual processing hierarchy. Instead of explicitly estimating a material's physical parameters, the visual  
226 system may derive a representation by learning the statistical image structures that materials exhibit<sup>54-57</sup>. Material perception

227 starts by extracting low-level image features and gradually integrating them into a mid-level representation, which indicates  
228 material properties. Subsequently, the mid-level features are combined to form a high-dimensional representational space that  
229 provides the basis for high-level processing, such as material categorization<sup>34</sup>.

230 Our discovery underscores the significance of acknowledging the top-down influence in material perception, challenging  
231 the conventional notion of strictly perceiving materials as a feed-forward process. Notably, we found that participants' visual  
232 judgments of material similarity align more closely with their own semantic representations of materials, as evidenced by verbal  
233 reports, rather than with image-level representations extracted from the image generation model. We observed substantial  
234 individual differences in material description. For the same image, participants could describe it differently and even oppositely.  
235 For example, one participant described the yellow soap-to-toy midpoint material (Figure 2E, Soap-to-toy panel, Leftmost in  
236 Top Row) as “soap”, “easy to deform”, and “translucent and glossy”. In contrast, another participant described the same image  
237 as “stone”, “hard”, and “opaque and cloudy”. When presented with identical image features, variations in high-level cognitive  
238 factors, such as material recognition, may determine how participants interpret and integrate information at the image level.  
239 This highlights the intricate interplay between low-level visual features and higher-level cognitive functions in perception<sup>37,58</sup>.

240 Evaluating the link between visual judgment and verbal description with behavioral data is the first step for probing their  
241 neural representations in material perception. Neuroscience research actively examined the neural representation of language  
242 and non-linguistic processing (e.g., music, working memory) and investigated the specificity and interrelationship of brain  
243 regions responsible for these cognitive skills<sup>59</sup>. Efforts were also made to explore how the brain encodes certain conceptual  
244 representations (e.g., objects, actions) elicited by visual and linguistic stimuli<sup>14,60</sup>. Recent work suggested that incorporating  
245 language feedback is crucial for explaining neural responses in high-level visual brain regions<sup>61</sup>. Following these practices, a  
246 plausible future direction could be to examine whether and how brain regions' engagement for visual judgment differs from  
247 those activated by semantic descriptions of materials. Addressing such cortical representations across modalities may help to  
248 unravel the open questions: What is the causal relationship between material recognition and attribute estimation? At a more  
249 fundamental level, how does the functional mechanism of perceiving materials differ from and connect to that of perceiving  
250 textures and objects?

251 Unlike previous works that usually examined material perception with real or rendered zoom-in surfaces, we intentionally  
252 synthesized images of materials coupling with object-level realism. Our approach of constructing a Space of Morphable  
253 Material Appearance with transfer learning and model interpolation methods could be extended to a broader range of materials  
254 (e.g., metal, glass). Beyond sampling at the interpolation midpoint, the expressiveness of our model and its latent representation  
255 offers a unique capability to manipulate material-related attributes (e.g., translucency and surface geometry) of the object while  
256 facilitating controlled and continuous adjustments of visual characteristics linked to material categories. This enables us to  
257 potentially design visual stimuli for psychophysical experiments to examine individual differences in material perception and  
258 related scene understanding. Given the lack of labeled image datasets of materials, our image synthesis framework can also  
259 serve as a versatile tool for data augmentation, providing an ample supply of additional samples for training in material-related

260 computer vision tasks, including material classification, text-to-image generation, and semantic material attribute editing.

## 261 **Methods**

### 262 **Image Datasets**

263 We created our training datasets of high-resolution images ( $1024 \text{ pixels} \times 1024 \text{ pixels}$ ) by taking photographs of real-world  
264 materials with an iPhone 12 Mini smartphone. Overall, our training data consists of three subcategories: soap ( $D_{\text{soap}}$ ),  
265 crystal ( $D_{\text{rock}}$ ), and squishy toy ( $D_{\text{toy}}$ ) datasets, including 8085 (60 objects), 3180 (24 objects), and 1900 (15 objects) images,  
266 respectively.

### 267 **StyleGAN and Transfer Learning**

268 We used the style-based generative adversarial network, StyleGAN2-ADA, as the backbone model. Our previous work, Liao  
269 et al. (2023)<sup>27</sup>, provides a detailed description of the model and the training process. StyleGAN2-ADA inherently applies a  
270 variety of data augmentation during training, and the length of training is defined by the total number of real images seen by the  
271 network. We obtained a Soap Model by training the StyleGAN2-ADA from scratch on  $D_{\text{soap}}$  for a total length of 3,836,000  
272 images, with a learning rate of 0.002 and  $R_1$  regularization of 10.

273 We fine-tuned the Soap Model separately on the  $D_{\text{rock}}$  and  $D_{\text{toy}}$ , which allows all model parameters to adjust to the new  
274 datasets. Full-model fine-tuning processes on  $D_{\text{rock}}$  and  $D_{\text{toy}}$  used the same hyperparameters as the training on  $D_{\text{soap}}$ . The  
275 lengths of fine-tuning were 1,060,000 and 960,000 images for  $D_{\text{rock}}$  and  $D_{\text{toy}}$ , respectively. We used the models with the lowest  
276 Fréchet Inception Distance (FID) scores for the rest of our study. The FID scores for Rock and Toy Models are 22.22 and 23.38,  
277 respectively. All training was performed on a Tesla V100 GPU on Google Colab.

### 278 **Cross-category Material Morphing**

279 The morphing of images of materials requires applying linear interpolation of the layer-wise latent codes  $w \in W$ , as well as the  
280 StyleGAN’s generator weights<sup>62</sup>. To morph from a source to a target material, we first sample two latent codes (i.e.,  $w_{\text{source}}$  and  
281  $w_{\text{target}}$ ) from the corresponding learned  $W$  latent spaces (e.g.,  $w_{\text{soap}} \in W_{\text{soap}}$  as source,  $w_{\text{rock}} \in W_{\text{rock}}$  as target). As illustrated in  
282 Figure 2C,  $w$  is a tensor with the dimension of  $18 \times 512$ . With equation (1), we can compute the interpolated latent code  $w_\lambda$ ,  
283 at any desired step size  $\lambda$ . The dimension of  $w_\lambda$  is also  $18 \times 512$ . Similarly, we implement linear interpolation between the  
284 convolutional weights of each convolution layer in the source material generator and the corresponding weights in the target  
285 material generator. The weights are multidimensional tensors. With the same  $\lambda$ , we calculate the interpolated generator weights  
286  $G_\lambda$  (equation (2)).

$$w_\lambda = w_{\text{source}} + \lambda(w_{\text{target}} - w_{\text{source}}) \quad (1)$$

$$G_\lambda = G_{\text{source}} + \lambda(G_{\text{target}} - G_{\text{source}}) \quad (2)$$



287 We insert  $w_\lambda$  into  $G_\lambda$  to generate the image of morphed material. Specifically, each of 18 slices of  $w_\lambda$  is injected into the  
288 convolution layer at the corresponding spatial resolution (from 4 pixels  $\times$  4 pixels to 1024 pixels  $\times$  1024 pixels) (Figure 2C).

## 289 **Psychophysical Experiments**

290 **Participants** Sixteen participants (13 female, median age = 22) from the American University (AU) were given informed  
291 consent and were reimbursed for their participation. All were Native English speakers and had a normal or corrected-to-normal  
292 vision. The experiments were approved by the ethics board at AU, and were conducted in adherence to the Declaration of  
293 Helsinki.

294 **Stimulus Selection** We first generated 30 images for each of the “original” materials: soaps, rocks, and squishy toys, by  
295 sampling from their corresponding latent spaces,  $W_{soap}$ ,  $W_{rock}$ , and  $W_{toy}$  and synthesizing with their paired material generators,  
296  $G_{soap}$ ,  $G_{rock}$ , and  $G_{toy}$ . We balanced the images in two lighting conditions for each material category: strong and weak (Figure  
297 2E).

298 We randomly paired up two different “original” materials under the same lighting conditions and then synthesized the image  
299 corresponding to the linear interpolation midpoint (step  $\lambda = 0.5$ ). We initially generated 1000 images of morphed materials  
300 through the corresponding midpoint material generators ( $G_{soap-to-rock}$ ,  $G_{soap-to-toy}$ , and  $G_{rock-to-toy}$ ). We picked 12 images  
301 synthesized from six material categories: soap, rock, squishy toy, soap-to-rock midpoint, rock-to-toy midpoint, and soap-to-toy  
302 midpoint. For each material category, half of the selected images are from strong lighting conditions (i.e., sunny indoor scene),  
303 and the remaining half are from weak lighting conditions (i.e., overcast indoor scene). We selected 72 images and tried to  
304 make the range of visual appearances as diverse and natural as possible. These images were then used as stimuli for Multiple  
305 Arrangement and Verbal Description tasks.

306 **Multiple Arrangement Task** We conducted the multiple arrangement experiment using Meadows.com ([https://](https://meadows-research.com/)  
307 [meadows-research.com/](https://meadows-research.com/)). Participants were instructed to arrange the images (180 pixels  $\times$  180 pixels) of materi-  
308 als based on the “similarity of material properties” by dragging and dropping them in the circled region (Figure 3A). In the  
309 first trial, the participants roughly arranged all 72 images into groups. In the subsequent trials, more refined subsets were  
310 chosen and displayed by an adaptive lift-the-weakest algorithm to reduce the remaining uncertainty of the similarity judgment  
311 of materials<sup>44</sup>. The average duration of the experiment was about 60 minutes. The pairwise on-screen Euclidean distances  
312 between the arranged images were computed upon the completion of the experiment, producing a Vision RDM with inverse  
313 MDS.

314 **Verbal Description Task** With the same 72 images used in the Multiple Arrangement task, participants described the material  
315 in the image by freely inputting texts based on five aspects (see Figure 3B). They had unlimited time on each trial and were not  
316 restricted regarding the order in which they could enter their responses.

317 **Experiment Procedures** All participants first completed the Multiple Arrangement task, and then the Verbal Description task  
318 in a separate session. All experiments were conducted in a dimly lit laboratory room. The stimuli were presented on an Apple

319 iMac computer with a 21.5-inch Retina Display, with a resolution of 1920 pixels  $\times$  1080 pixels.

320 **Creating Text RDMs from Verbal Description Data** We used a fixed template to concatenate the five aspects that participants  
321 described an image: “It is a material of [material name] with the color of [color], it is [optical properties], it is [mechanical  
322 properties], and it is [surface texture].” Next, we encoded the concatenated text into a feature vector through a pre-trained  
323 LLM. The four commonly used pre-trained transformer-based language models (i.e., CLIP<sup>7</sup>, BERT<sup>45</sup>, Sentence-BERT<sup>46</sup>, and  
324 GPT-2<sup>47</sup>) can embed a sentence or paragraph of text into a high-dimensional feature space. For CLIP, Sentence-BERT, and  
325 GPT-2, we extracted the feature vector at the last hidden layer. For BERT, we concatenated the feature vectors from its last four  
326 hidden layers. The size of the embedded text feature vector varies across different language models: 512 for CLIP, 3072 for  
327 BERT, 384 for Sentence-BERT, and 768 for GPT-2. For each participant, we built a  $72 \times 72$  Text RDM by computing the  
328 pairwise cosine dissimilarity between the resulting feature vectors of the verbal descriptions (Figure 4A, Bottom Row).

329 To investigate the effect of removing the “material name” on the embedding of the verbal descriptions, we used the following  
330 template to form the image caption: “It is a material with the color of [color], it is [optical properties], it is [mechanical  
331 properties], and it is [surface texture].” Hence, we used the same procedure described above to encode the descriptions without  
332 material names as feature vectors.

333 **Creating StyleSpace-Feature RDMs** We used StyleGAN’s StyleSpace<sup>48</sup> to describe the innate image features of materials  
334 (Figure 7A). For a StyleGAN generator, a  $4 \times 4$  input is progressively expanded to a  $1024 \times 1024$  output image. For each major  
335 resolution (every resolution from 4 pixels  $\times$  4 pixels to 1024 pixels  $\times$  1024 pixels), there are two convolution layers (conv0 and  
336 conv1) for feature map synthesis (except that the  $4 \times 4$  resolution only has conv1) and a single convolution layer (i.e., tRGB  
337 layer) that converts the output to an RGB image. The latent code  $w \in W$  is injected into different learned convolution layers to  
338 obtain the channel-wise style vectors, namely StyleSpace. Here, we focused on the style vectors for feature map representation.

339 Overall, we can extract 17 style vectors representing latent image features across different generative steps for a particular  
340 generated image. The dimensionality of these style vectors varies depending on their corresponding spatial resolution of the  
341 convolution layer, gradually decreasing from 512-dimension at  $4 \times 4$  resolution to 32-dimension at  $1024 \times 1024$  resolution.

342 For the 72 images used in the psychophysical experiments, we extracted their StyleSpace features and computed the  
343 pairwise Euclidean distances between images, thus generating 17 StyleSpace-feature RDMs (i.e., one for each StyleSpace  
344 layer) (see examples in Figure 7C).

345 **Predicting Vision RDM with Text and StyleSpace-feature RDMs** To determine the contribution of verbal description  
346 and image-level features to the multiple arrangement behavior, we use multiple linear regression based on the Text and  
347 StyleSpace-feature RDMs<sup>63</sup>.

348 We first converted the  $72 \times 72$  RDMs into 2556-dimensional feature vectors, by extracting the off-diagonal elements of an  
349 RDM. We set the participant’s own Vision RDM feature vector as the predicted variable. Two first-order multiple regression  
350 models were fitted for each participant: one “full” model that included the Text RDM and all 17 StyleSpace-feature RDMs; and

351 one “reduced” model that only included the Text RDM. For each model, we computed the adjusted  $R^2$  to indicate the explained  
352 variance of the Vision RDM. We also used ANOVA to test whether the “full” model improves the fit of the data compared to  
353 the “reduced” model, with statistical significance (95% confidence level).

## 354 References

- 355 1. Pinker, S. & Bloom, P. Natural language and natural selection. *Behav. brain sciences* **13**, 707–727 (1990).
- 356 2. Brown, R. W. & Lenneberg, E. H. A study in language and cognition. *The J. Abnorm. Soc. Psychol.* **49**, 454 (1954).
- 357 3. Regier, T., Kay, P. & Cook, R. S. Focal colors are universal after all. *Proc. Natl. Acad. Sci.* **102**, 8386–8391 (2005).
- 358 4. Zaslavsky, N., Kemp, C., Regier, T. & Tishby, N. Efficient compression in color naming and its evolution. *Proc. Natl.*  
359 *Acad. Sci.* **115**, 7937–7942 (2018).
- 360 5. Dils, A. T. & Boroditsky, L. Processing unrelated language can change what you see. *Psychon. bulletin & review* **17**,  
361 882–888 (2010).
- 362 6. Lupyan, G., Rahman, R. A., Boroditsky, L. & Clark, A. Effects of language on visual perception. *Trends cognitive sciences*  
363 **24**, 930–944 (2020).
- 364 7. Radford, A. *et al.* Learning transferable visual models from natural language supervision. In *International conference on*  
365 *machine learning*, 8748–8763 (PMLR, 2021).
- 366 8. Zhou, K., Yang, J., Loy, C. C. & Liu, Z. Learning to prompt for vision-language models. *Int. J. Comput. Vis.* **130**,  
367 2337–2348 (2022).
- 368 9. Vo, N. *et al.* Composing text and image for image retrieval-an empirical odyssey. In *Proceedings of the IEEE/CVF*  
369 *conference on computer vision and pattern recognition*, 6439–6448 (2019).
- 370 10. Hu, R. *et al.* Natural language object retrieval. In *Proceedings of the IEEE conference on computer vision and pattern*  
371 *recognition*, 4555–4564 (2016).
- 372 11. Ramesh, A., Dhariwal, P., Nichol, A., Chu, C. & Chen, M. Hierarchical text-conditional image generation with clip latents.  
373 *arXiv preprint arXiv:2204.06125* **1**, 3 (2022).
- 374 12. Rombach, R., Blattmann, A., Lorenz, D., Esser, P. & Ommer, B. High-resolution image synthesis with latent diffusion  
375 models. In *Proceedings of the IEEE/CVF conference on computer vision and pattern recognition*, 10684–10695 (2022).
- 376 13. Hebart, M. N. *et al.* Things-data, a multimodal collection of large-scale datasets for investigating object representations in  
377 human brain and behavior. *Elife* **12**, e82580 (2023).
- 378 14. Bonner, M. F. & Epstein, R. A. Object representations in the human brain reflect the co-occurrence statistics of vision and  
379 language. *Nat. communications* **12**, 4081 (2021).
- 380 15. Xiao, B. & Brainard, D. H. Surface gloss and color perception of 3d objects. *Vis. neuroscience* **25**, 371–385 (2008).

- 381 **16.** Schmid, A. C., Barla, P. & Doerschner, K. Material category of visual objects computed from specular image structure.  
382 *Nat. Hum. Behav.* **7**, 1152–1169 (2023).
- 383 **17.** Olkkonen, M. & Brainard, D. H. Joint effects of illumination geometry and object shape in the perception of surface  
384 reflectance. *i-Perception* **2**, 1014–1034, DOI: [10.1068/i0480](https://doi.org/10.1068/i0480) (2011).
- 385 **18.** Toscani, M., Valsecchi, M. & Gegenfurtner, K. R. Lightness perception for matte and glossy complex shapes. *Vis. Res.*  
386 **131**, 82–95, DOI: [10.1016/j.visres.2016.12.004](https://doi.org/10.1016/j.visres.2016.12.004) (2017).
- 387 **19.** Fleming, R. W. & Bühlhoff, H. H. Low-level image cues in the perception of translucent materials. **2**, 346–382, DOI:  
388 [10.1145/1077399.1077409](https://doi.org/10.1145/1077399.1077409) (2005).
- 389 **20.** Motoyoshi, I. Highlight–shading relationship as a cue for the perception of translucent and transparent materials. *J. Vis.*  
390 **10(9)**:, 1–11, DOI: [10.1167/10.9.6](https://doi.org/10.1167/10.9.6) (2010).
- 391 **21.** Nagai, T. *et al.* Image regions contributing to perceptual translucency: A psychophysical reverse-correlation study.  
392 *i-Perception* **4**, 407–428, DOI: [10.1068/i0576](https://doi.org/10.1068/i0576) (2013).
- 393 **22.** Xiao, B. *et al.* Looking against the light: How perception of translucency depends on lighting direction. *J. Vis.* **14(3)**:,  
394 1–22, DOI: [10.1167/14.3.17](https://doi.org/10.1167/14.3.17) (2014).
- 395 **23.** Xiao, B., Zhao, S., Gkioulekas, I., Bi, W. & Bala, K. Effect of geometric sharpness on translucent material perception. *J.*  
396 *Vis.* **20(7)**:, 1–17, DOI: [10.1167/jov.20.7.10](https://doi.org/10.1167/jov.20.7.10) (2020).
- 397 **24.** Gkioulekas, I. *et al.* Understanding the role of phase function in translucent appearance. *ACM Transactions on Graph.*  
398 *(TOG)* **32**, 1–19 (2013).
- 399 **25.** Marlow, P. J. & Anderson, B. L. The cospecification of the shape and material properties of light permeable materials.  
400 *Proc. Natl. Acad. Sci.* **118**, e2024798118, DOI: [10.1073/pnas.2024798118](https://doi.org/10.1073/pnas.2024798118) (2021).
- 401 **26.** Liao, C., Sawayama, M. & Xiao, B. Crystal or jelly? effect of color on the perception of translucent materials with  
402 photographs of real-world objects. *J. Vis.* **22**, 6–6, DOI: [10.1167/jov.22.2.6](https://doi.org/10.1167/jov.22.2.6) (2022).
- 403 **27.** Liao, C., Sawayama, M. & Xiao, B. Unsupervised learning reveals interpretable latent representations for translucency  
404 perception. *PLOS Comput. Biol.* **19**, e1010878, DOI: [10.1371/journal.pcbi.1010878](https://doi.org/10.1371/journal.pcbi.1010878) (2023).
- 405 **28.** Fleming, R. W., Jäkel, F. & Maloney, L. T. Visual perception of thick transparent materials. *Psychol. Sci.* **22**, 812–820  
406 (2011).
- 407 **29.** Di Stefano, N. & Spence, C. Roughness perception: A multisensory/crossmodal perspective. *Attention, Perception, &*  
408 *Psychophys.* **84**, 2087–2114 (2022).
- 409 **30.** Cavdan, M., Drewing, K. & Doerschner, K. The look and feel of soft are similar across different softness dimensions. *J.*  
410 *vision* **21**, 20–20 (2021).

- 411 **31.** Bi, W., Jin, P., Nienborg, H. & Xiao, B. Manipulating patterns of dynamic deformation elicits the impression of cloth with  
412 varying stiffness. *J. Vis.* **19**, 18–18, DOI: [10.1167/19.5.18](https://doi.org/10.1167/19.5.18) (2019).
- 413 **32.** Zaidi, Q. Visual inferences of material changes: color as clue and distraction. *Wiley Interdiscip. Rev. Cogn. Sci.* **2**, 686–700  
414 (2011).
- 415 **33.** Sawayama, M., Adelson, E. H. & Nishida, S. Visual wetness perception based on image color statistics. *J. Vis.* **17**, 7–7,  
416 DOI: [10.1167/17.5.7](https://doi.org/10.1167/17.5.7) (2017).
- 417 **34.** Fleming, R. W. Material perception. *Annu. Rev. Vis. Sci.* **3**, 365–388, DOI: [10.1146/annurev-vision-102016-061429](https://doi.org/10.1146/annurev-vision-102016-061429)  
418 (2017).
- 419 **35.** Hiramatsu, C., Goda, N. & Komatsu, H. Transformation from image-based to perceptual representation of materials along  
420 the human ventral visual pathway. *Neuroimage* **57**, 482–494 (2011).
- 421 **36.** Nishio, A., Goda, N. & Komatsu, H. Neural selectivity and representation of gloss in the monkey inferior temporal cortex.  
422 *J. Neurosci.* **32**, 10780–10793, DOI: [10.1523/JNEUROSCI.1095-12.2012](https://doi.org/10.1523/JNEUROSCI.1095-12.2012) (2012).
- 423 **37.** Baumgartner, E. & Gegenfurtner, K. R. Image statistics and the representation of material properties in the visual cortex.  
424 *Front. Psychol.* **7**, 1185 (2016).
- 425 **38.** Komatsu, H. & Goda, N. Neural mechanisms of material perception: Quest on shitsukan. *Neuroscience* **392**, 329–347,  
426 DOI: [10.1016/j.neuroscience.2018.09.001](https://doi.org/10.1016/j.neuroscience.2018.09.001) (2018).
- 427 **39.** van Assen, J. J. R., Barla, P. & Fleming, R. W. Visual features in the perception of liquids. *Curr. Biol.* **28**, 452–458, DOI:  
428 [10.1016/j.cub.2017.12.037](https://doi.org/10.1016/j.cub.2017.12.037) (2018).
- 429 **40.** Serrano, A., Gutierrez, D., Myszkowski, K., Seidel, H.-P. & Masia, B. An intuitive control space for material appearance.  
430 *arXiv preprint arXiv:1806.04950* (2018).
- 431 **41.** Schmidt, F., Hebart, M. N., Fleming, R. W. *et al.* Core dimensions of human material perception. DOI: [10.31234/osf.io/  
432 jz8ks](https://doi.org/10.31234/osf.io/jz8ks) (2022).
- 433 **42.** Cavdan, M., Goktepe, N., Drewing, K. & Doerschner, K. Assessing the representational structure of softness activated by  
434 words. *Sci. Reports* **13**, 8974 (2023).
- 435 **43.** Karras, T. *et al.* Training generative adversarial networks with limited data. *Adv. Neural Inf. Process. Syst.* **33**, 12104–12114  
436 (2020).
- 437 **44.** Kriegeskorte, N. & Mur, M. Inverse mds: Inferring dissimilarity structure from multiple item arrangements. *Front.  
438 psychology* **3**, 245 (2012).
- 439 **45.** Devlin, J., Chang, M.-W., Lee, K. & Toutanova, K. Bert: Pre-training of deep bidirectional transformers for language  
440 understanding. *arXiv preprint arXiv:1810.04805* (2018).



- 441 **46.** Reimers, N. & Gurevych, I. Sentence-bert: Sentence embeddings using siamese bert-networks. *arXiv preprint*  
442 *arXiv:1908.10084* (2019).
- 443 **47.** Radford, A. *et al.* Language models are unsupervised multitask learners. *OpenAI blog* **1**, 9 (2019).
- 444 **48.** Wu, Z., Lischinski, D. & Shechtman, E. StyleSpace analysis: Disentangled controls for StyleGAN image generation. In  
445 *Proceedings of the IEEE/CVF Conference on Computer Vision and Pattern Recognition*, 12863–12872, DOI: [10.1109/](https://doi.org/10.1109/CVPR46437.2021.01267)  
446 [CVPR46437.2021.01267](https://doi.org/10.1109/CVPR46437.2021.01267) (2021).
- 447 **49.** Binz, M. & Schulz, E. Using cognitive psychology to understand gpt-3. *Proc. Natl. Acad. Sci.* **120**, e2218523120 (2023).
- 448 **50.** Marjeh, R., Sucholutsky, I., van Rijn, P., Jacoby, N. & Griffiths, T. L. What language reveals about perception: Distilling  
449 psychophysical knowledge from large language models. *arXiv preprint arXiv:2302.01308* (2023).
- 450 **51.** Gentner, D. & Rattermann, M. J. *Language and the career of similarity* (University of Illinois at Urbana-Champaign,  
451 Center for the Study of Reading, 1991).
- 452 **52.** Regier, T., Kemp, C. & Kay, P. Word meanings across languages support efficient communication. *The handbook language*  
453 *emergence* 237–263 (2015).
- 454 **53.** Witzel, C. & Gegenfurtner, K. R. Color perception: Objects, constancy, and categories. *Annu. Rev. Vis. Sci.* **4**, 475–499  
455 (2018).
- 456 **54.** Fleming, R. W. Visual perception of materials and their properties. *Vis. Res.* **94**, 62–75, DOI: [10.1016/j.visres.2013.11.004](https://doi.org/10.1016/j.visres.2013.11.004)  
457 (2014).
- 458 **55.** Nishida, S. Image statistics for material perception. *Curr. Opin. Behav. Sci.* **30**, 94–99 (2019).
- 459 **56.** Storrs, K. R., Anderson, B. L. & Fleming, R. W. Unsupervised learning predicts human perception and misperception of  
460 gloss. *Nat. Hum. Behav.* **5**, 1402–1417, DOI: [10.1038/s41562-021-01097-6](https://doi.org/10.1038/s41562-021-01097-6) (2021).
- 461 **57.** Storrs, K. R. & Fleming, R. W. Learning about the world by learning about images. *Curr. Dir. Psychol. Sci.* **30**, 120–128,  
462 DOI: [10.1177/0963721421990334](https://doi.org/10.1177/0963721421990334) (2021).
- 463 **58.** Fleming, R. W., Wiebel, C. & Gegenfurtner, K. Perceptual qualities and material classes. *J. vision* **13**, 9–9 (2013).
- 464 **59.** Fedorenko, E., Behr, M. K. & Kanwisher, N. Functional specificity for high-level linguistic processing in the human brain.  
465 *Proc. Natl. Acad. Sci.* **108**, 16428–16433 (2011).
- 466 **60.** Wurm, M. F. & Caramazza, A. Distinct roles of temporal and frontoparietal cortex in representing actions across vision  
467 and language. *Nat. communications* **10**, 289 (2019).
- 468 **61.** Wang, A. Y., Kay, K., Naselaris, T., Tarr, M. J. & Wehbe, L. Better models of human high-level visual cortex emerge from  
469 natural language supervision with a large and diverse dataset. *Nat. Mach. Intell.* 1–12 (2023).
- 470 **62.** Wu, Z., Nitzan, Y., Shechtman, E. & Lischinski, D. Stylealign: Analysis and applications of aligned stylegan models.  
471 *arXiv preprint arXiv:2110.11323* (2021).

472 **63.** Groen, I. I. *et al.* Distinct contributions of functional and deep neural network features to representational similarity of  
473 scenes in human brain and behavior. *Elife* **7**, e32962 (2018).

## 474 **Acknowledgments**

475 This work was supported by the National Institutes of Health grant 1R15EY033512.
